# Supplementary material
Source: PubMed Central journal article supplement (PMC10111424)
Supplement: NIHMS1881955-supplement-Supplemental_Material.pdf [file NIHMS1881955-supplement-Supplemental_Material.pdf]

## Supplemental Table S1

*Correlations between PID-5 Domains and Other Forms of Pathology*

| Personality Disorder Score | NEG   | DET         | ANT  | DIS  | PSY         |
|----------------------------|-------|-------------|------|------|-------------|
|                            |       | Paranoid    |      |      |             |
| Dichotomous Diagnosis      | .09   | .15         | .16  | .15  | .14         |
| Summed Total               | .27*  | <b>.30*</b> | .21* | .28* | <b>.34*</b> |
| Suspects others of harm    | .11   | .18         | .09  | .12  | .22         |
| Doubts loyalty of others   | .12   | .11         | .16  | .16  | .17         |
| Reluctant to confide       | .18   | .27         | .12  | .20  | .22         |
| Reads hidden meanings      | .24   | .21         | .12  | .22  | .23         |
| Bears grudges              | .20   | .18         | .18  | .18  | .23         |
| Perceives attacks          | .16   | .17         | .16  | .19  | .26         |
| Recurrent suspicions       | .19   | .17         | .10  | .20  | .18         |
|                            |       | Schizoid    |      |      |             |
| Dichotomous Diagnosis      | -.01  | .16         | .07* | .11  | .11         |
| Summed Total               | .00   | <b>.48*</b> | .04  | .10  | .19*        |
| No desire for closeness    | -.05  | .25         | .04  | .06  | .15         |
| Chooses solitude           | .04   | <b>.45</b>  | .04  | .07  | .17         |
| Little interest in sex     | -.03  | .29         | .00  | .00  | .03         |
| No pleasure in activities  | .06   | .21         | .07* | .15* | .12         |
| Lacks close friends        | .09   | <b>.35</b>  | .02  | .11  | .15         |
| Indifferent to praise      | -.16* | -.01        | -.04 | -.08 | -.01        |
| Emotional coldness         | -.01  | .16         | .03  | .11  | .14         |
|                            |       | Schizotypal |      |      |             |
| Dichotomous Diagnosis      | -.02  | .07         | .05  | .07  | .15         |
| Summed Total               | .17   | <b>.33</b>  | .16  | .27* | <b>.45*</b> |
| Ideas of reference         | .12   | .24         | .15  | .24  | <b>.32</b>  |
| Odd beliefs                | .09   | .04         | .07  | .09  | <b>.32</b>  |
| Unusual experiences        | .13   | .10         | .11  | .16  | <b>.46*</b> |
| Odd thinking/speech        | -.09  | .04         | .03  | .02  | .09         |
| Suspiciousness             | .22*  | .29         | .19* | .27* | <b>.30</b>  |
| Inappropriate affect       | -.01  | .14         | .04  | .10  | .14         |
| Eccentric behavior         | .00   | .07         | .09  | .07  | .07         |
| Lacks close friends        | .09   | <b>.35*</b> | .02  | .11  | .15         |
| Social anxiety             | .13   | .26         | .04  | .18  | .21         |

(table continues)

Supplemental Table S1 (cont.)

| Personality Disorder Score  | NEG         | DET         | ANT         | DIS         | PSY  |
|-----------------------------|-------------|-------------|-------------|-------------|------|
| Histrionic                  |             |             |             |             |      |
| Dichotomous Diagnosis       | .10         | -.00        | .12         | .09         | .06  |
| Summed Total                | .27         | -.02        | .27         | .22*        | .23  |
| Dislikes lack of attention  | .13         | -.07        | <b>.31*</b> | .16         | .13  |
| Provocative behavior        | .09         | -.08        | <b>.30*</b> | .15         | .16  |
| Shifting/shallow emotions   | <b>.31*</b> | .15*        | .14         | .22*        | .26* |
| Draws attention to self     | .09         | -.11        | .21         | .09         | .09  |
| Impressionistic speech      | -.03        | .02         | .07         | .01         | .05  |
| Theatricality               | .21         | .01         | .05         | .09         | .10  |
| Is suggestible              | .18         | .04         | .02         | .13         | .11  |
| Overestimates intimacy      | .13         | -.05        | .13         | .12         | .15  |
| Avoidant                    |             |             |             |             |      |
| Dichotomous Diagnosis       | .27         | <b>.34</b>  | -.00        | .20         | .13  |
| Summed Total                | <b>.35*</b> | <b>.46*</b> | -.06        | .26*        | .19  |
| Avoids criticism/rejection  | .20         | <b>.32</b>  | .00         | .18         | .17  |
| Needs to be liked           | <b>.32</b>  | <b>.37</b>  | -.05        | .25*        | .21* |
| Fears shame/ridicule        | .22         | <b>.33</b>  | .04         | .23         | .21* |
| Focused on rejection        | <b>.30</b>  | <b>.31</b>  | -.01        | .21         | .12  |
| Feels socially inadequate   | .24         | <b>.35</b>  | -.12*       | .17         | .11  |
| Sees self as socially inept | .23         | <b>.37</b>  | -.09        | .17         | .12  |
| Avoids embarrassment        | .26         | <b>.30</b>  | -.10        | .11         | .04  |
| Dependent                   |             |             |             |             |      |
| Dichotomous Diagnosis       | .20         | .11         | -.04        | .17         | .05  |
| Summed Total                | <b>.45*</b> | .18*        | .05         | <b>.30*</b> | .17* |
| Trouble making decisions    | .27         | .11         | .00         | .16         | .10  |
| Others take responsibility  | .25         | .15         | .01         | .19         | .10  |
| Won't disagree with others  | .25         | .14         | -.03        | .14         | .03  |
| Trouble taking initiative   | .18         | .16         | -.05        | .19         | .02  |
| Seeks support from others   | .29         | .10         | .08         | .15         | .17* |
| Helpless when alone         | <b>.36</b>  | .07         | .04         | .18         | .14  |
| Seeks new relationship      | <b>.30</b>  | .05         | .14*        | .26         | .15  |
| Fears taking care of self   | <b>.43</b>  | .19*        | -.02        | .22         | .18* |

(table continues)

Supplemental Table S1 (cont.)

| Personality Disorder Score | NEG                  | DET  | ANT  | DIS  | PSY  |
|----------------------------|----------------------|------|------|------|------|
|                            | Obsessive-Compulsive |      |      |      |      |
| Dichotomous Diagnosis      | .12                  | .15  | .11  | .08  | .17  |
| Summed Total               | .21                  | .18* | .12  | .12  | .23* |
| Preoccupied with details   | .23*                 | .17* | .06  | .16* | .17  |
| Perfectionism              | .16                  | .11  | .08  | .12  | .17  |
| Devoted to work            | .02                  | -.00 | -.01 | -.08 | .02  |
| Overconscientious          | .00                  | .07  | .01  | -.02 | .07  |
| Unable to discard          | .09                  | .15  | .04  | .12  | .16  |
| Can't delegate tasks       | .22*                 | .09  | .11  | .09  | .15  |
| Miserly spending style     | -.03                 | .04  | .05  | -.04 | .04  |
| Rigidity & stubbornness    | .14                  | .14  | .17* | .10  | .18  |

*Note.*  $N = 600$ . Correlations with an absolute value  $\geq .30$  are in bold. PID-5 = Personality Inventory for *DSM-5*. NEG = Negative Affect. DET = Detachment. ANT = Antagonism. DIS = Disinhibition. PSY = Psychoticism.

\* Highest correlation (absolute value within  $\pm .01$ ) in column for each disorder

## Supplemental Table S2

*Standardized  $\beta$  Weights from Multiple Regression Analyses*

| Personality Disorder Score | NEG          | DET          | ANT          | DIS          | PSY          |
|----------------------------|--------------|--------------|--------------|--------------|--------------|
| Borderline PD              | <b>.63**</b> | <b>.46**</b> | -.08         | <b>.40**</b> | <b>.45**</b> |
| Antisocial PD              | -.13**       | -.09         | .25**        | .22**        | .03          |
| Narcissistic PD            | -.08         | -.09*        | <b>.34**</b> | -.06         | .09*         |

$N = 600$ . Regression weights with an absolute value  $\geq .30$  are in bold. PD = personality disorder.

NEG = Negative Affect. DET = Detachment. ANT = Antagonism. DIS = Disinhibition. PSY =

Psychoticism.

\* $p < .05$     \*\* $p < .01$

Supplemental Figure 1.

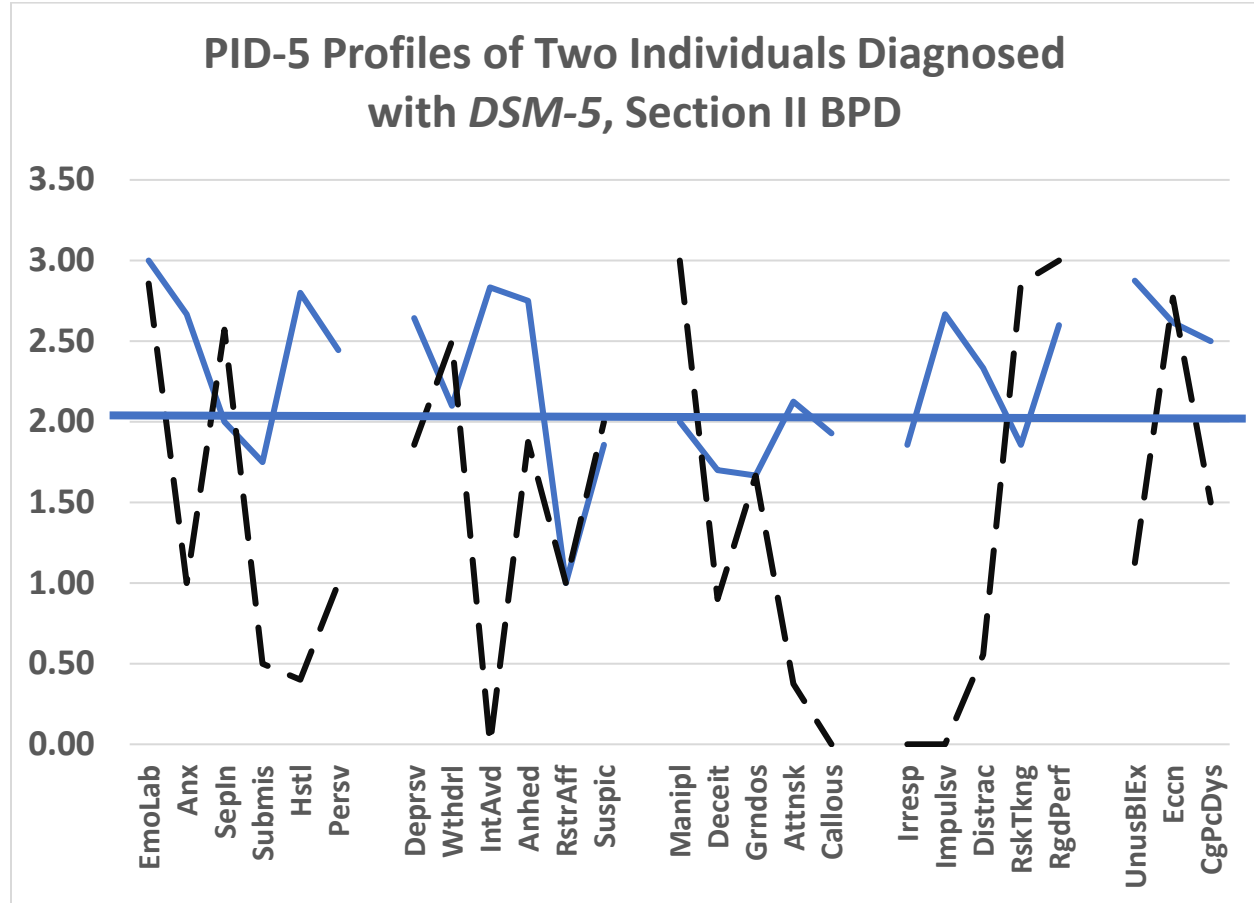

Figure Caption. PID-5 = Personality Inventory for *DSM-5*. (Krueger et al., 2012). *DSM-5* = *Diagnostic and Statistical Manual, 5<sup>th</sup> Edition*. (American Psychiatric Association, 2013). BPD = Borderline personality disorder. EmoLab = Emotional Lability. Anx = Anxiousness. SepIn = Separation Insecurity. Submiss = Submissiveness. Hstl = Hostility. Persv = Perseveration. Deprsv = Depressivity. Wthdrl = Withdrawal. IntAvd = Intimacy Avoidance. Anhed = Anhedonia. RstrAff = Restricted Affectivity. Suspicious = Suspiciousness. Manipul = Manipulativeness. Deceit = Deceitfulness. Grndos = Grandiosity. Attnsk = Attention Seeking. Callous = Callousness. Irresp = Irresponsibility. Impulsv = Impulsivity. Distrac = Distractibility. RskTkng = Risk taking. RgdPerf = Rigid Perfectionism. UnusBlEx = Unusual Beliefs and Experiences. Eccn = Eccentricity. CgPcDys = Cognitive and Perceptual Dysregulation.
